# Supplementary material for: Domestic Violence Housing First Model and Association With Survivors’ Housing Stability, Safety, and Well-being Over 2 Years
Source: PubMed Central journal article supplement (PMC10293912; doi:10.1001/jamanetworkopen.2023.20213), 2023-06-26
Supplement: jamanetwopen-e2320213-s001.pdf [file jamanetwopen-e2320213-s001.pdf]

## Supplementary Online Content

Sullivan CM, Simmons C, Guerrero M, et al. Domestic Violence Housing First model and association with survivors' housing stability, safety, and well-being over 2 years. *JAMA Netw Open*. 2023;6(6):e2320213. doi:10.1001/jamanetworkopen.2023.20213

**eMethods.** Inverse Probability Weighting and Balance Diagnostics

**eTable 1.** Logistic Regressions With Intervention (SAU or DVHF) Associated With Baseline Characteristics

**eTable 2.** Covariates Included in Each Mixed-Effects Model, by Outcome

**eTable 3.** Diagnostic Results for Inverse Probability Weighting: Overidentification Test for Covariate Balance

**eTable 4.** Diagnostic Results for Inverse Probability Weighting: Balance of Covariates

**eReferences**

This supplementary material has been provided by the authors to give readers additional information about their work.

## **eMethods.** Inverse Probability Weighting and Balance Diagnostics

Inverse probability weights<sup>1</sup> were included in the mixed effect models sampling weights to account for selection bias resulting from factors that increased the probability that certain individuals received the DVHF model. Prior to estimating the IPWs, we first used logistic regression models to examine whether there were any meaningful baseline differences between those who received DVHF versus those receiving SAU across 72 variables (Table S1). Statistical significance was set at  $p < .05$ . Thirteen factors were identified and used to calculate the IPWs: parenting children (y/n), living with the abuser (y/n), racial/ethnic minority (y/n), having been in foster care as a child (y/n), housing barriers, housing instability, staying with friends to avoid homelessness (y/n), inability to make ends meet, overall abuse, alcohol misuse, drug misuse, quality of life, and whether or not the DV agency was in a rural area (y/n). Next, a propensity score ( $p(x)=P(T=1|X=x)$ ), or the probability of treatment based on relevant measured baseline covariates, was obtained for each individual. The inverse of the propensity score ( $w(x)=1/p(x)$  for treated individuals and  $w(x)=1/(1-p(x))$  for untreated individuals) was used as a weight.

To ensure that our groups were balanced (i.e. there are no systematic differences in the baseline factors between the DVHF and SAU groups),<sup>2,3</sup> we conducted an overidentification test for covariate balance<sup>4</sup>, which tests whether the distribution of a covariate is the same for all treatment levels (Table S3), and compared the standardized differences and variance ratios between DVHF and SAU in the raw and weighted data (Table S4).

**eTable 1.** Logistic Regressions With Intervention (SAU or DVHF) Associated With Baseline Characteristics

| Variable                                           | Odds Ratio   | SE           | <i>p</i>     | 95% CI       |              |
|----------------------------------------------------|--------------|--------------|--------------|--------------|--------------|
| 1. Age                                             | 0.999        | 0.012        | 0.947        | 0.975        | 1.024        |
| 2. Hispanic/Latinx (Y/N)                           | 0.828        | 0.192        | 0.416        | 0.526        | 1.304        |
| <b>3. Racial Minority (Y/N)</b>                    | <b>1.616</b> | <b>0.372</b> | <b>0.037</b> | <b>1.029</b> | <b>2.538</b> |
| 4. English as primary language (Y/N)               | 1.137        | 0.323        | 0.652        | 0.651        | 1.985        |
| 5. Cisgender (Y/N)                                 | 0.959        | 0.235        | 0.866        | 0.593        | 1.551        |
| 6. Heterosexual (Y/N)                              | 1.502        | 0.485        | 0.208        | 0.797        | 2.830        |
| 7. US citizen (Y/N)                                | 0.543        | 0.170        | 0.052        | 0.294        | 1.004        |
| 8. Involved with abuser (Y/N)                      | 0.498        | 0.183        | 0.058        | 0.242        | 1.023        |
| 9. Homeless as child                               | 0.872        | 0.235        | 0.612        | 0.514        | 1.479        |
| 10. In agency shelter (Y/N)                        | 0.911        | 0.207        | 0.683        | 0.584        | 1.423        |
| <b>11. Living with abuser (Y/N)</b>                | <b>0.410</b> | <b>0.179</b> | <b>0.041</b> | <b>0.174</b> | <b>0.964</b> |
| 12. Length of relationship with abuser (in months) | 0.999        | 0.001        | 0.347        | 0.996        | 1.001        |
| 13. Length of abuse (in days)                      | 1.000        | 0.000        | 0.826        | 1.000        | 1.000        |
| 14. Overall physical health                        | 1.125        | 0.119        | 0.268        | 0.913        | 1.385        |
| <b>15. Children (Y/N)</b>                          | <b>1.703</b> | <b>0.424</b> | <b>0.033</b> | <b>1.045</b> | <b>2.775</b> |
| 16. Number of children                             | 0.993        | 0.083        | 0.930        | 0.843        | 1.170        |
| 17. Use of child                                   | 1.095        | 0.127        | 0.435        | 0.872        | 1.376        |
| 18. Employed in last 6-months                      | 1.299        | 0.292        | 0.244        | 0.836        | 2.018        |
| 19. Feelings about employment                      | 1.036        | 0.059        | 0.536        | 0.927        | 1.158        |
| 20. Enrolled in school                             | 1.825        | 0.588        | 0.062        | 0.970        | 3.433        |
| 21. Access to car (Y/N)                            | 0.969        | 0.225        | 0.891        | 0.615        | 1.526        |
| 22. Driver's license (Y/N)                         | 1.464        | 0.337        | 0.098        | 0.932        | 2.299        |
| 23. Less than high school education (Y/N)          | 1.082        | 0.051        | 0.096        | 0.986        | 1.187        |

|                                                                              |              |              |              |              |              |
|------------------------------------------------------------------------------|--------------|--------------|--------------|--------------|--------------|
| 24. Depression                                                               | 0.986        | 0.016        | 0.384        | 0.955        | 1.018        |
| 25. Anxiety                                                                  | 0.988        | 0.017        | 0.480        | 0.954        | 1.022        |
| 26. PTSD                                                                     | 1.020        | 0.046        | 0.665        | 0.933        | 1.115        |
| 27. Difficulty paying bills                                                  | 0.972        | 0.160        | 0.865        | 0.704        | 1.344        |
| 28. Borrowed money for rent or mortgage                                      | 1.240        | 0.282        | 0.343        | 0.795        | 1.936        |
| 29. Lifetime homelessness                                                    | 1.000        | 0.000        | 0.374        | 1.000        | 1.000        |
| <b>30. Foster care (Y/N)</b>                                                 | <b>0.500</b> | <b>0.143</b> | <b>0.016</b> | <b>0.285</b> | <b>0.877</b> |
| 31. Housing barriers                                                         | 0.570        | 0.148        | 0.031        | 0.343        | 0.948        |
| <b>32. Stayed with friends or family to avoid homelessness (as an adult)</b> | <b>0.412</b> | <b>0.161</b> | <b>0.024</b> | <b>0.191</b> | <b>0.888</b> |
| <b>33. Inability to make ends meet</b>                                       | <b>0.849</b> | <b>0.061</b> | <b>0.023</b> | <b>0.737</b> | <b>0.977</b> |
| 34. Financial strain                                                         | 0.980        | 0.092        | 0.828        | 0.814        | 1.179        |
| 35. Physical disability (Y/N)                                                | 0.812        | 0.186        | 0.362        | 0.519        | 1.271        |
| 36. Mental health issues (Y/N)                                               | 1.033        | 0.248        | 0.893        | 0.646        | 1.652        |
| <b>37. Overall abuse</b>                                                     | <b>0.699</b> | <b>0.106</b> | <b>0.019</b> | <b>0.519</b> | <b>0.943</b> |
| 38. Economic abuse - restriction of finances                                 | 0.881        | 0.077        | 0.149        | 0.742        | 1.046        |
| 39. Economic abuse - financial exploitation                                  | 0.898        | 0.097        | 0.319        | 0.726        | 1.110        |
| <b>40. Drug misuse</b>                                                       | <b>0.781</b> | <b>0.074</b> | <b>0.009</b> | <b>0.649</b> | <b>0.940</b> |
| <b>41. Alcohol misuse</b>                                                    | <b>0.779</b> | <b>0.091</b> | <b>0.032</b> | <b>0.620</b> | <b>0.978</b> |
| 42. Internal tools related to safety                                         | 1.322        | 0.252        | 0.143        | 0.910        | 1.922        |
| 43. Trade-offs related to safety                                             | 1.207        | 0.151        | 0.134        | 0.944        | 1.543        |
| 44. Expectations of support related to safety                                | 1.117        | 0.164        | 0.450        | 0.838        | 1.490        |
| 45. Hope                                                                     | 1.462        | 0.320        | 0.083        | 0.952        | 2.246        |
| 46. Positive emotions                                                        | 1.223        | 0.143        | 0.086        | 0.972        | 1.539        |
| 47. Negative emotions                                                        | 0.833        | 0.093        | 0.102        | 0.670        | 1.037        |
| 48. Social support                                                           | 0.844        | 0.083        | 0.084        | 0.697        | 1.023        |
| <b>49. Quality of life</b>                                                   | <b>1.268</b> | <b>0.123</b> | <b>0.015</b> | <b>1.048</b> | <b>1.535</b> |

|                                      |              |              |              |              |              |
|--------------------------------------|--------------|--------------|--------------|--------------|--------------|
| <b>50. Seeking help with housing</b> | <b>0.119</b> | <b>0.124</b> | <b>0.041</b> | <b>0.015</b> | <b>0.916</b> |
| 51. Seeking help with employment     | 0.945        | 0.214        | 0.803        | 0.607        | 1.473        |
| 52. Seeking help with education      | 0.880        | 0.205        | 0.584        | 0.557        | 1.390        |
| 53. Seeking help with finances       | 1.858        | 0.735        | 0.117        | 0.856        | 4.035        |
| 54. Seeking legal help               | 0.728        | 0.184        | 0.209        | 0.444        | 1.195        |
| 55. Seeking help with childcare      | 1.138        | 0.257        | 0.566        | 0.731        | 1.772        |
| 56. Seeking help with counseling     | 0.864        | 0.277        | 0.647        | 0.461        | 1.618        |
| 57. Seeking help w transportation    | 1.420        | 0.318        | 0.117        | 0.916        | 2.202        |
| 58. Seeking help with healthcare     | 0.879        | 0.203        | 0.577        | 0.560        | 1.382        |
| 59. Seeking help children's needs    | 1.061        | 0.239        | 0.791        | 0.683        | 1.650        |
| 60. Seeking help with food           | 0.722        | 0.168        | 0.162        | 0.458        | 1.139        |
| 61. Seeking help with clothing       | 0.712        | 0.169        | 0.153        | 0.446        | 1.134        |
| 62. Seeking help for material goods  | 1.101        | 0.265        | 0.690        | 0.687        | 1.764        |
| 63. Seeking help with social support | 1.213        | 0.365        | 0.522        | 0.672        | 2.187        |
| <b>64. Housing Instability</b>       | <b>0.713</b> | <b>0.054</b> | <b>0.000</b> | <b>0.616</b> | <b>0.827</b> |
| 65. Sexual Abuse                     | 0.923        | 0.068        | 0.273        | 0.799        | 1.065        |
| <b>66. Stalking</b>                  | <b>0.843</b> | <b>0.058</b> | <b>0.014</b> | <b>0.736</b> | <b>0.966</b> |
| 67. Physical Abuse                   | 0.861        | 0.087        | 0.140        | 0.706        | 1.050        |
| 68. Emotional Abuse                  | 0.850        | 0.073        | 0.058        | 0.719        | 1.006        |
| 69. Economic Abuse                   | 0.866        | 0.092        | 0.173        | 0.703        | 1.065        |
| <b>70. Rural/Urban</b>               | <b>0.391</b> | <b>0.091</b> | <b>0.000</b> | <b>0.248</b> | <b>0.618</b> |
| 71. Reads English                    | 1.071        | 0.160        | 0.646        | 0.799        | 1.437        |
| 72. Household Income                 | 0.996        | 0.047        | 0.935        | 0.909        | 1.092        |

*Note.* Two factors were omitted: “Seeking help with housing” perfectly predicted cases, which would have resulted in their exclusion from the model; and “Stalking” is a subscale of Overall Abuse (which was included in the model) and the two baseline scores were highly correlated ( $r = 0.811$ ). Reference group is survivors who received services as usual (0= SAU, 1= DVHF).

**eTable 2.** Covariates Included in Each Mixed-Effects Model, by Outcome

| Housing Instability                      | Domestic Violence                            |                                       |
|------------------------------------------|----------------------------------------------|---------------------------------------|
| 1. Financial difficulty                  | Financial difficulty                         |                                       |
| 2. US citizenship (Y/N)                  | Have children (Y/N)                          |                                       |
| 3. Employment in last 6 months (Y/N)     | Age                                          |                                       |
| 4. Lifetime homelessness in days         | US citizenship                               |                                       |
| 5. Have children (Y/N)                   |                                              |                                       |
| 6. Relationship with abuser (Y/N)        |                                              |                                       |
| Depression                               | Anxiety                                      | PTSD                                  |
| 1. Have a disability (Y/N)               | Financial difficulty                         | Have disability (Y/N)                 |
| 2. Less than high school education (Y/N) | Racial and ethnic minoritized identity (Y/N) | Have children (Y/N)                   |
| 3. Financial difficulty                  | Have a disability (Y/N)                      | Financial difficulty                  |
| 4. Have children (Y/N)                   | Have children (Y/N)                          | Read English (Y/N)                    |
| 5. Relationship with abuser (Y/N)        |                                              | Less than high school education (Y/N) |
| 6. US citizenship                        |                                              | Age                                   |

**eTable 3.** Diagnostic Results for Inverse Probability Weighting: Overidentification Test for Covariate Balance

|              |      |
|--------------|------|
| $\chi^2(14)$ | 8.19 |
| p-value      | 0.88 |

*Note.* The null hypothesis that the IPW model is balanced was not rejected, indicating that the covariates are balanced between the intervention groups.

**eTable 4.** Diagnostic Results for Inverse Probability Weighting: Balance of Covariates

|                                            | Standardized Differences |          | Variance Ratio |          |
|--------------------------------------------|--------------------------|----------|----------------|----------|
|                                            | Raw                      | Weighted | Raw            | Weighted |
| Parenting children (Y/N)                   | 0.23                     | -0.01    | 0.79           | 1.01     |
| Living with abuser                         | -0.23                    | -0.02    | 0.46           | 0.93     |
| Racial/ethnic minority                     | 0.24                     | -0.03    | 0.87           | 1.02     |
| Foster Care                                | -0.29                    | 0.00     | 0.61           | 1.00     |
| Housing Barriers                           | -0.25                    | 0.01     | 1.30           | 0.99     |
| Housing Instability                        | -0.51                    | 0.01     | 1.16           | 0.84     |
| Staying with friends to avoid homelessness | -0.25                    | -0.08    | 1.87           | 1.24     |
| Inability to make ends meet                | -0.22                    | 0.08     | 1.26           | 0.88     |
| Overall abuse                              | -0.28                    | -0.04    | 0.82           | 1.23     |
| Alcohol misuse                             | -0.20                    | -0.01    | 0.48           | 0.79     |
| Drug misuse                                | -0.27                    | 0.04     | 0.44           | 0.76     |
| Quality of Life                            | 0.31                     | 0.00     | 1.07           | 1.11     |
| Rural/Urban                                | -0.47                    | -0.04    | 1.17           | 1.01     |



## eReferences

1. Hernán MA, Robins JM. Causal inference. CRC Boca Raton, FL; 2010.
2. Austin PC, Stuart EA. Moving towards best practice when using inverse probability of treatment weighting (IPTW) using the propensity score to estimate causal treatment effects in observational studies. *Stat Med*. Dec 10 2015;34(28):3661-79. doi:10.1002/sim.6607
3. Austin PC. Balance diagnostics for comparing the distribution of baseline covariates between treatment groups in propensity-score matched samples. *Stat Med*. Nov 10 2009;28(25):3083-107. doi:10.1002/sim.3697
4. Imai K, Ratkovic M. Covariate balancing propensity score. *Journal of the Royal Statistical Society: Series B (Statistical Methodology)*. 2014;76:243-263. doi:10.1111/rssb.12027
