# Supplementary material for: Domestic Violence Housing First Model and Association With Survivors’ Housing Stability, Safety, and Well-being Over 2 Years
Source: PubMed Central journal article supplement (PMC10293912; doi:10.1001/jamanetworkopen.2023.20213), 2023-06-26
Supplement: jamanetwopen-e2320213-s002.pdf [file jamanetwopen-e2320213-s002.pdf]

## Data Sharing Statement

Sullivan. Domestic Violence Housing First Model and Association With Survivors' Housing Stability, Safety, and Well-being Over 2 Years. *JAMA Netw Open*. Published June 26, 2023. doi:10.1001/jamanetworkopen.2023.20213

### Data

**Data available:** Yes

**Data types:** Deidentified participant data

**How to access data:** Request from Dr. Cris Sullivan: [sulliv22@msu.edu](mailto:sulliv22@msu.edu)

**When available:** With publication

### Supporting Documents

**Document types:** None

### Additional Information

**Who can access the data:** Researchers whose proposed use of the data has been approved

**Types of analyses:** For any purpose

**Mechanisms of data availability:** With a signed data access agreement
